# Supplementary material for: Gaseous CO and toluene co-oxidation over monolithic core–shell Co3O4-based hetero-structured catalysts
Source: Royal Society of Chemistry journal article supplement (doi:10.1039/c9ta03750k), 2019-01-01
Supplement: c9ta03750k1.pdf [file c9ta03750k1.pdf]

## Supplementary information

Gaseous CO and toluene co-oxidation over monolithic core-shell  $\text{Co}_3\text{O}_4$ -based hetero-structured catalysts

Shengpeng Mo,<sup>a</sup> Qi Zhang,<sup>a</sup> Yuhai Sun,<sup>a</sup> Mingyuan Zhang,<sup>a</sup> Jiaqi Li,<sup>a</sup> Quanming Ren,<sup>a</sup> Mingli Fu,<sup>a,b,c</sup> Junliang Wu,<sup>a,b,c</sup> Limin Chen<sup>a,b,c</sup> and Daiqi Ye<sup>a,b,c</sup> \*

<sup>a</sup> School of Environment and Energy, South China University of Technology, Guangzhou 510006, PR China

<sup>b</sup> National Engineering Laboratory for VOCs Pollution Control Technology and Equipment, Guangzhou Higher Education Mega Centre, Guangzhou 510006, PR China

<sup>c</sup> Guangdong Provincial Key Laboratory of Atmospheric Environment and Pollution Control (SCUT), Guangzhou Higher Education Mega Centre, Guangzhou 510006, PR China  
E-mail address: cedqye@scut.edu.cn (D. Ye)

## Experimental section

### Material characterizations

X-ray powder diffraction (XRD) patterns of the monolithic samples were performed by using a Panalytical X'Pert PRO system with Cu-K $\alpha$  ( $\lambda=1.5406\text{\AA}$ ) radiation operated at 40kV and 40mA. The data were collected with a scan rate of  $10^\circ \text{ min}^{-1}$  within the range of scattering angle  $2\theta$  of 5 to  $90^\circ$ .

The size and morphology of samples were characterized by using field-emission scanning electron microscopy (FESEM, JEOL JSM-6700F) with an acceleration voltage of 15 kV, 10 mM. The microstructures of the samples were characterized on a transmission electron microscope (TEM, JEOL JEM-2010F) at a voltage of 200 kV.

A Micromeritics ASAP2020 was used to measure the surface areas and pore size distribution of the samples at  $-196^\circ\text{C}$ . Before the tests, the corresponding samples were degassed at  $150^\circ\text{C}$  for 6 h to remove physically adsorbed impurities.

The hydrogen temperature programmed reduction ( $\text{H}_2$ -TPR) and oxygen temperature programmed desorption ( $\text{O}_2$ -TPD) measurement was measured on an Automated Catalyst Characterization System (Autochem 2920, MICROMERITICS) equipped with a thermal conductivity detector (TCD). The corresponding samples ( $1\text{ cm} \times 3\text{ cm} \times 1.6\text{ mm}$ ) was placed in a quartz reactor under a gas flow ( $5\% \text{ H}_2/\text{Ar}$ ,  $30\text{ ml min}^{-1}$ ) with a constant rate of  $10^\circ\text{C min}^{-1}$  up to  $700^\circ\text{C}$ . The temperature programmed desorption of  $\text{O}_2$  ( $\text{O}_2$ -TPD) with  $1\text{ cm} \times 3\text{ cm} \times 1.6\text{ mm}$  catalysts was pre-heated in  $5\% \text{ O}_2/\text{He}$  flow from room temperature to  $300^\circ\text{C}$  and held for 1h ( $30\text{ mL min}^{-1}$ ), and then cooling to room temperature. The catalysts were heated from room temperature to  $800^\circ\text{C}$  at  $10^\circ\text{C min}^{-1}$  in pure He ( $30\text{ mL min}^{-1}$ ).

The Raman spectrum of the monolithic samples was performed on a Renishaw RM2000 Raman Spectrometer (laser wavelength =  $532\text{ nm}$ ) with a scan number of 10 from  $100$  to  $900\text{ cm}^{-1}$  and a resolution of  $1\text{ cm}^{-1}$ .

X-ray photoelectron spectroscopy (XPS) measurement was performed by using an XLESCALAB 250Xi electron spectrometer from VG Scientific with monochromatic Al K $\alpha$  ( $1486.6\text{ eV}$ ) radiation, and the binding energy was calibrated based on the C 1s peaks at  $284.8\text{ eV}$ .

The collected exhaust gas was detected by mass spectrometry (HPR-20 QIC, Benchtop Gas

Analysis System).

All of the operando diffuse reflectance infrared FT spectroscopy (DRIFTS) results were collected on an FTIR spectrometer (Nicolet IS50R FT-IR) equipped with a Harrick DRIFT cell and an MCT/A detector in the range of 650–8000  $\text{cm}^{-1}$  with 32 scans at a resolution of 4  $\text{cm}^{-1}$  using a KBr window. In a typical experiment, the powder samples were pre-treated in pure  $\text{N}_2$  (100  $\text{mL min}^{-1}$ ) at 300 °C for 1 h to remove the residuals. After cooled down to 35 °C, and a background spectrum was collected at 4  $\text{cm}^{-1}$  resolution for 32 scans in  $\text{N}_2$  atmosphere. Then, the reactant gas (1 vol. % CO or 500 ppm toluene) was continuously introduced into the in-situ reaction chamber. The DRIFTS spectra (4000–650  $\text{cm}^{-1}$ ) were collected and continuously recorded for 1 h to realize the adsorption equilibrium.

### **Catalytic activity measurements**

Catalytic activities over each monolithic sample for 1.0 vol.% CO or 1000 ppm toluene combustion reaction were carried out using a fixed-bed quartz tubular micro-reactor ( $\phi = 6$  mm) with quartz wool packed at both ends of the catalyst bed, and gas hour space velocity (GHSV = 10,000  $\text{h}^{-1}$ ) was controlled by adjusting the gas volume ratio. The CO/toluene balanced with air (20 vol.%  $\text{O}_2$  + balance  $\text{N}_2$ ) was purged into the reactor at a certain flow rate (100  $\text{mL min}^{-1}$ ). After reacted at the final temperature for 1 h, the concentrations of reactants and products were analyzed on-line by a gas chromatograph (Shimadzu GC-2014) equipped with thermal conductivity detector (FID).

To investigate the effect of water vapor on the catalytic activity, the on-stream CO or toluene oxidation experiment was carried out in the presence and absence of 1.0 or 5.0 vol% water vapor.

Typically, an air flow containing gaseous CO/toluene was used for bubbling through water in a 250 mL conical flask at 50 °C to give a water vapor amount of 1.0 or 5.0 vol.%, and CO/toluene was used for catalytic testing.

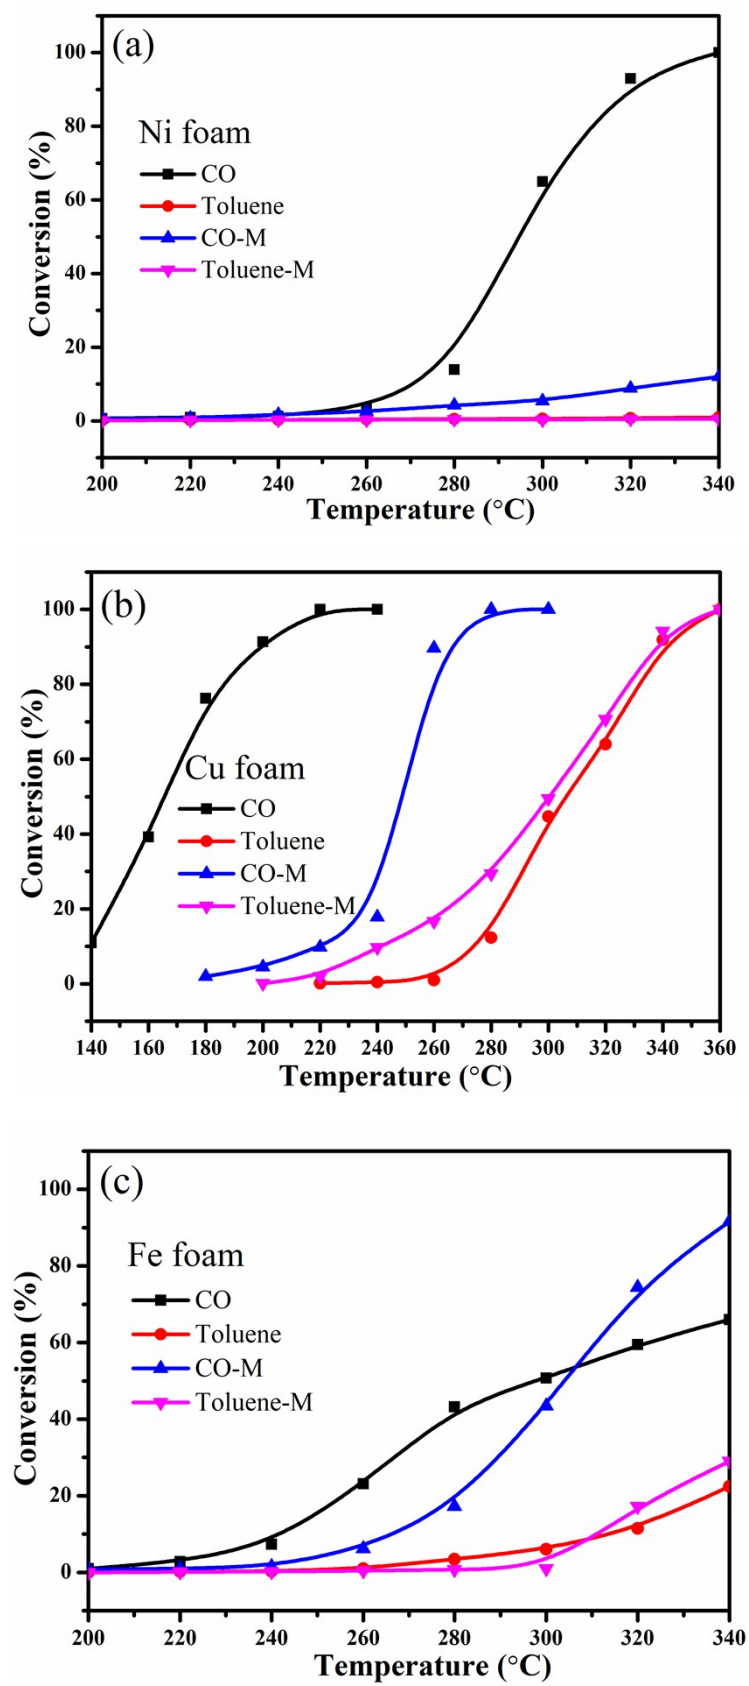

**Fig. S1** The catalytic behaviors for CO/toluene oxidation over metal substrates (Ni foam, Fe foam and Cu foam). Simple conditions: 1.0% CO or 1000 ppm toluene balanced with air; Mixture conditions: 1.0 vol.% CO and 1000 ppm toluene balanced with air. All the reactions were kept at

GHSV= 10,000 h<sup>-1</sup>.

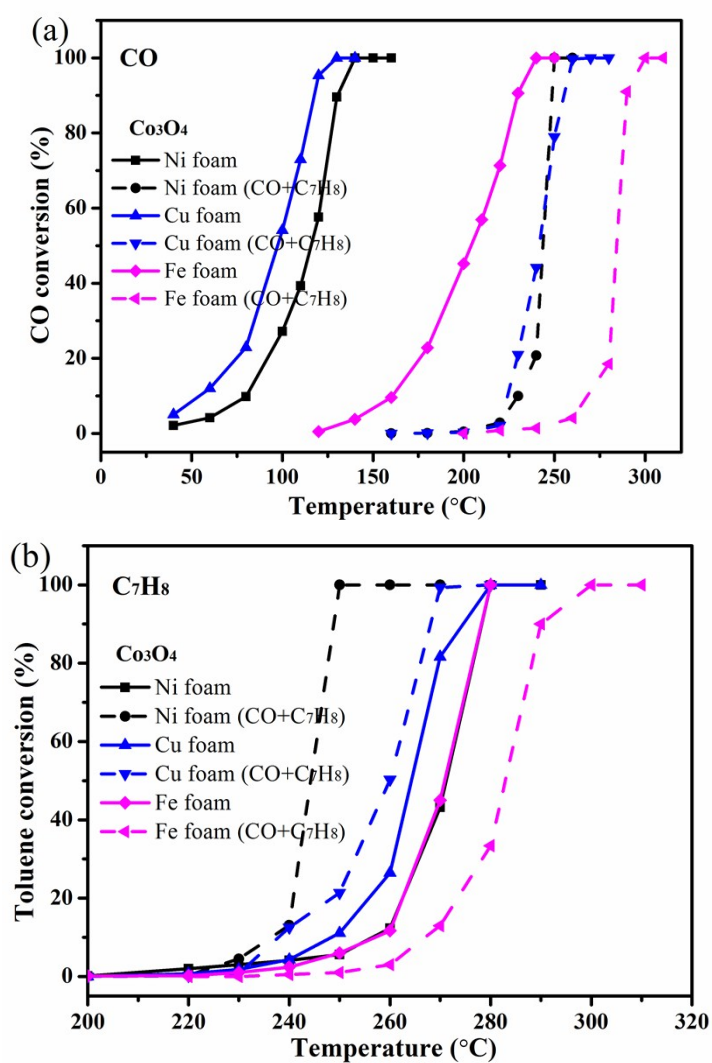

**Fig. S2** (a) CO conversion and (b) toluene conversion curves in different atmospheres over the Co<sub>3</sub>O<sub>4</sub> samples in-situ grown on different metal substrates as a function of temperature. Simple conditions: 1.0 vol.% CO or 1000 ppm toluene balanced with air; Mixture conditions: 1.0 vol.% CO and 1000 ppm toluene balanced with air. All the reactions were kept at GHSV= 10,000 h<sup>-1</sup>.

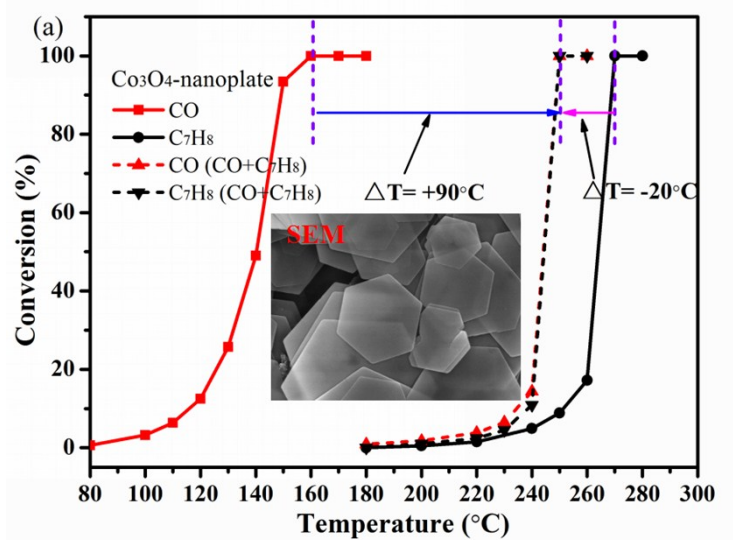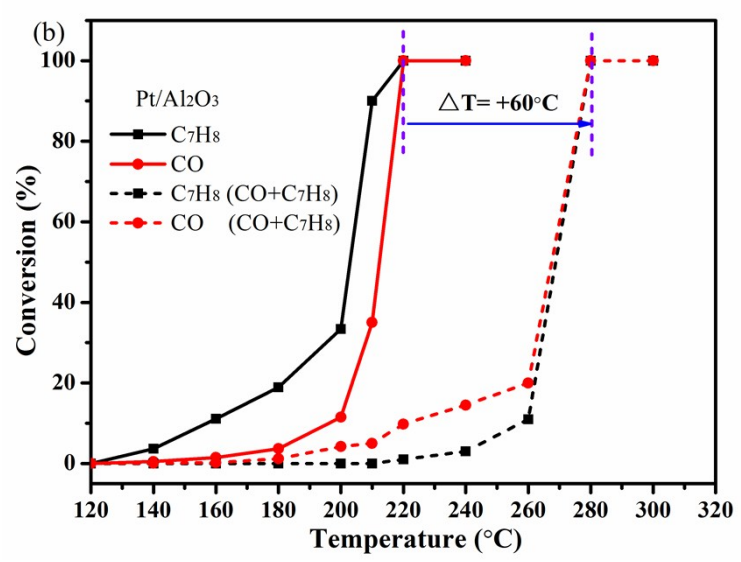

**Fig. S3** Different pollutants conversion in different atmospheres over the powder (a)  $\text{Co}_3\text{O}_4$ -nanoplate and (b)  $\text{Pt}/\text{Al}_2\text{O}_3$  catalysts as a function of temperature. Simple conditions: 1.0 vol.% CO or 1000 ppm toluene balanced with air; Mixture conditions: 1.0 vol.% CO and 1000 ppm toluene balanced with air. All the reactions were kept at  $\text{WHSV} = 60,000 \text{ mL g}^{-1} \text{ h}^{-1}$ .

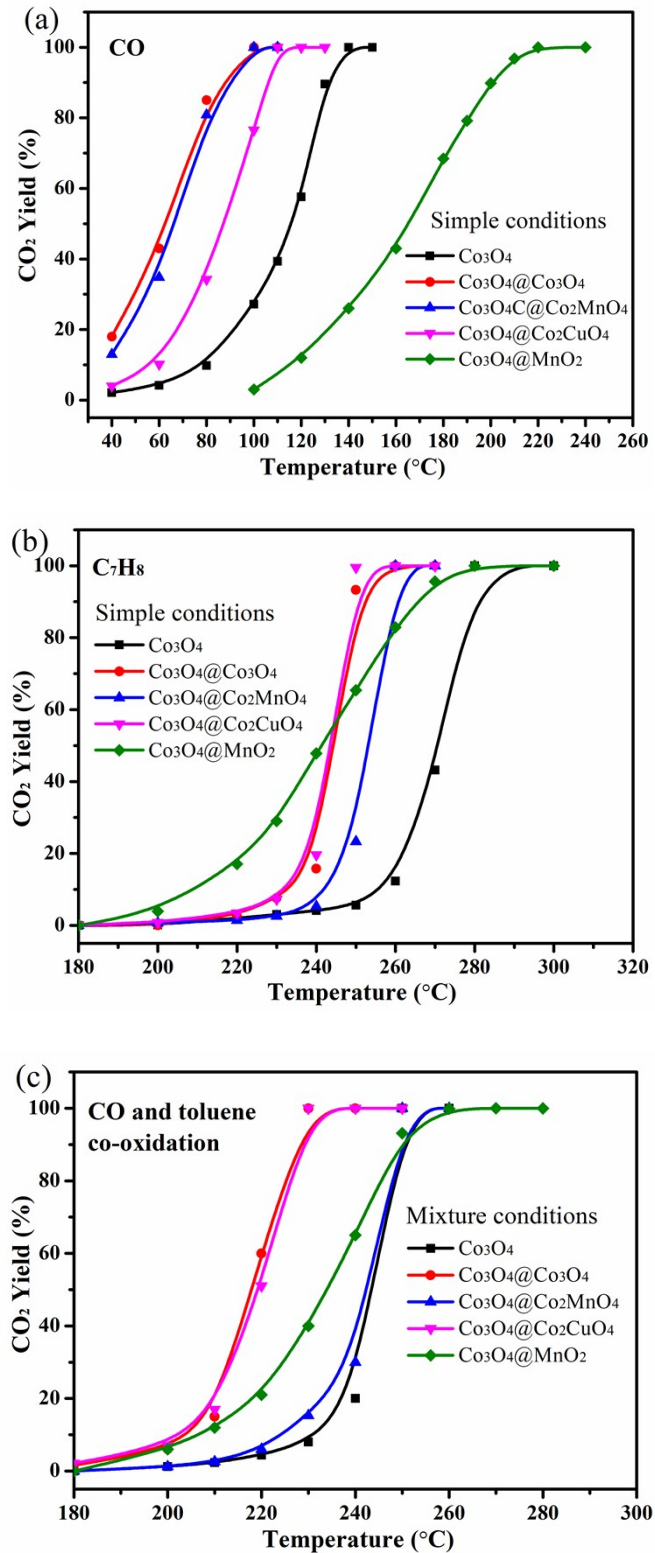

**Fig. S4** The CO<sub>2</sub> yield curves of (a) CO oxidation, (b) toluene oxidation, and (c) CO-toluene co-oxidation over the monolithic Co<sub>3</sub>O<sub>4</sub>-based NA catalysts, respectively. Simple conditions: 1.0 vol.% CO or 1000 ppm toluene balanced with air; Mixture conditions: 1.0 vol.% CO and 1000 ppm toluene balanced with air. All the reactions were kept at GHSV= 10,000 h<sup>-1</sup>.

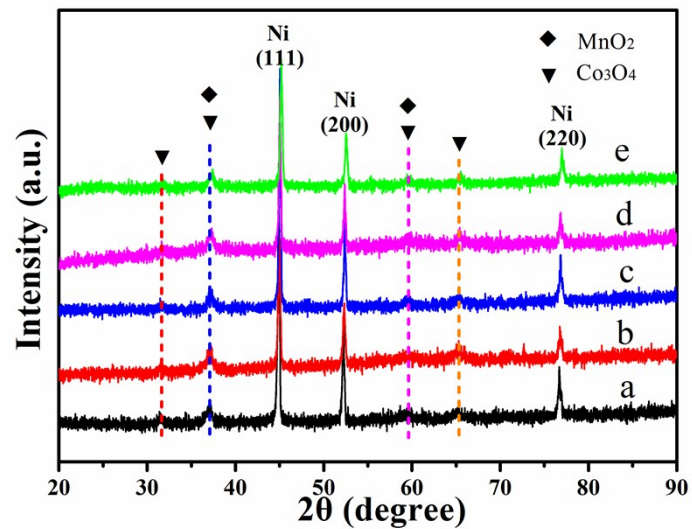

**Fig. S5** XRD patterns of the hetero-structured NA samples in-situ grown on Ni foam, labels a–e corresponded to  $\text{Co}_3\text{O}_4$ ,  $\text{Co}_3\text{O}_4@\text{Co}_3\text{O}_4$ ,  $\text{Co}_3\text{O}_4@\text{Co}_2\text{MnO}_4$ ,  $\text{Co}_3\text{O}_4@\text{Co}_2\text{CuO}_4$ , and  $\text{Co}_3\text{O}_4@\text{MnO}_2$ , respectively.



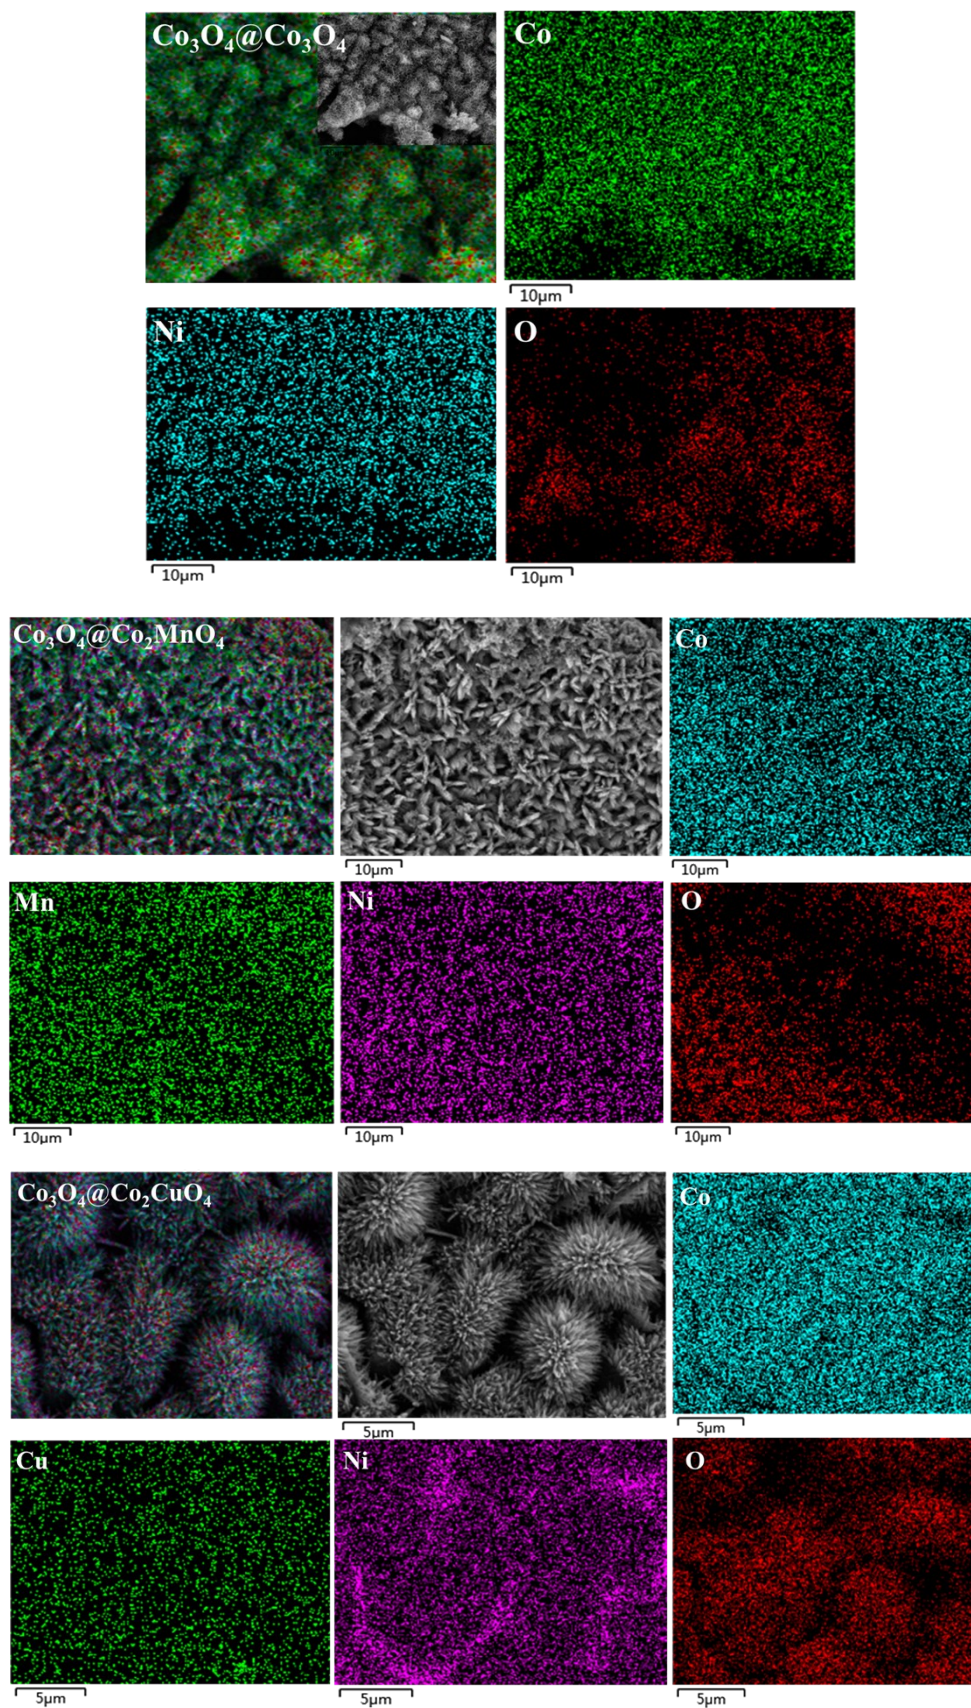

**Fig. S6** EDS analysis and elemental mapping of  $\text{Co}_3\text{O}_4@\text{Co}_3\text{O}_4$ ,  $\text{Co}_3\text{O}_4@\text{Co}_2\text{MnO}_4$  and  $\text{Co}_3\text{O}_4@\text{Co}_2\text{CuO}_4$  samples.

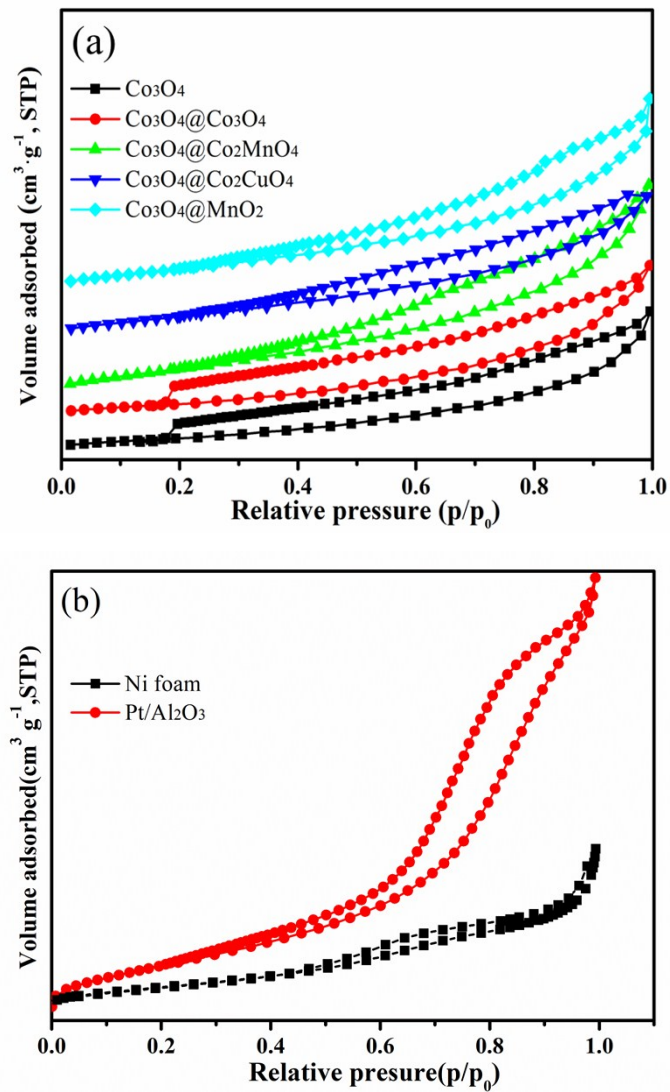

Fig. S7  $\text{N}_2$  adsorption/desorption isotherms of all the samples.

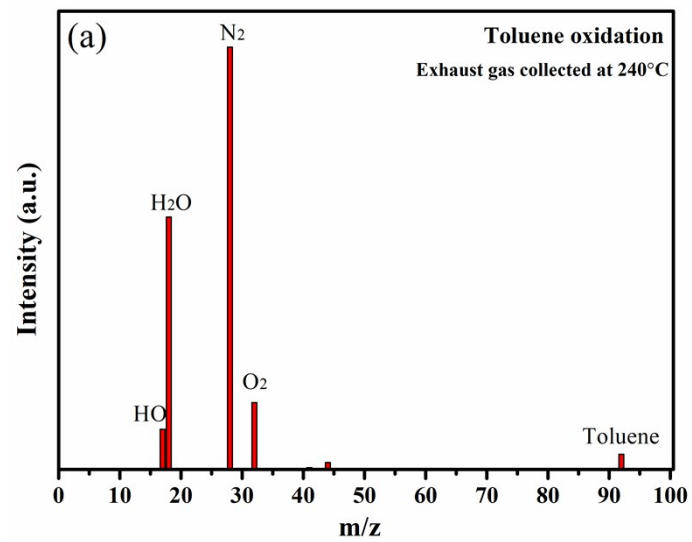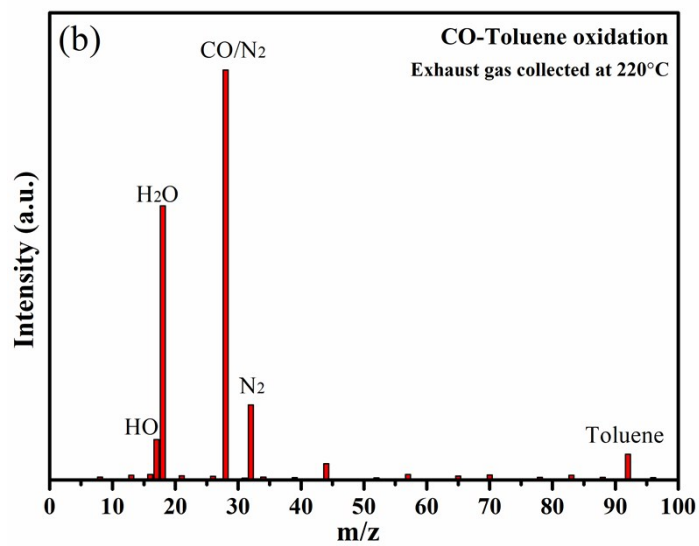

**Fig. S8** Mass spectra of exhaust gas collected at different conditions over  $\text{Co}_3\text{O}_4@\text{Co}_3\text{O}_4$  catalyst.

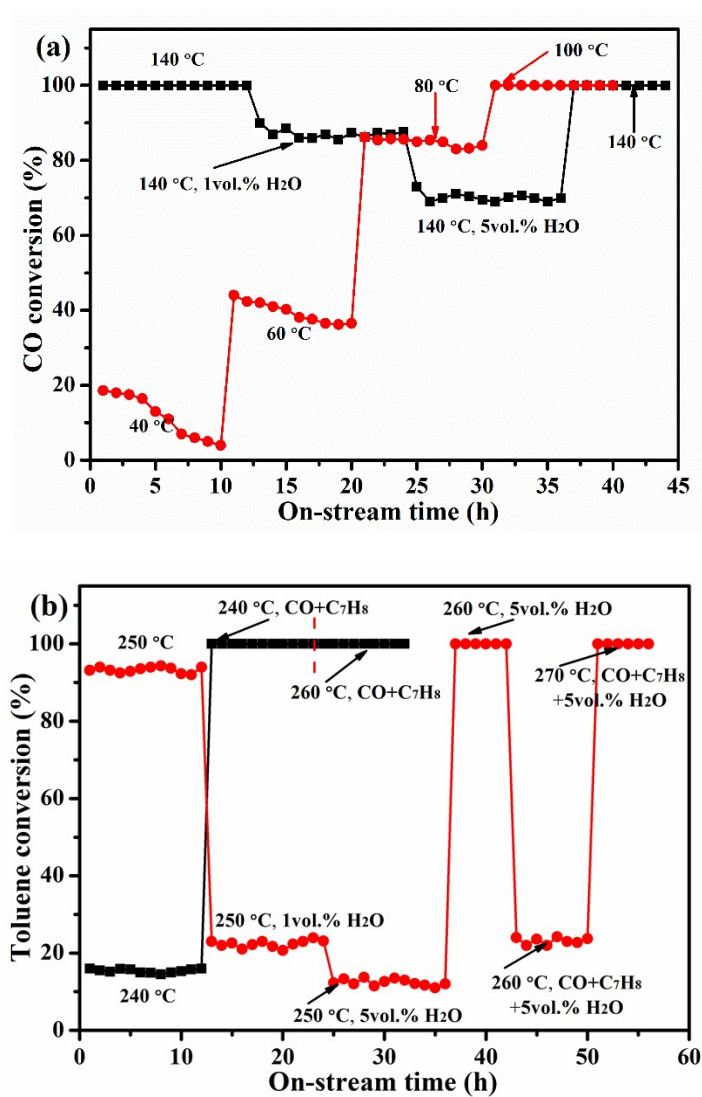

**Fig. S9** (a) CO conversion and (b) toluene conversion curves at different reaction conditions over the  $\text{Co}_3\text{O}_4@\text{Co}_3\text{O}_4$  catalyst as a function of time. All the reactions were kept at  $\text{GHSV} = 10,000 \text{ h}^{-1}$ .

**Table S1** Catalytic performances of as-synthesized catalysts for CO and/or toluene oxidation in

different atmospheres.

| Samples                                                          | Simple conditions   |                     |                     |                     | Mixture conditions  |                     |                     |                     |
|------------------------------------------------------------------|---------------------|---------------------|---------------------|---------------------|---------------------|---------------------|---------------------|---------------------|
|                                                                  | CO                  |                     | toluene             |                     | CO                  |                     | toluene             |                     |
|                                                                  | T <sub>50</sub> /°C | T <sub>99</sub> /°C |
| Co <sub>3</sub> O <sub>4</sub>                                   | 115                 | 140                 | 273                 | 280                 | 245                 | 250                 | 246                 | 250                 |
| Co <sub>3</sub> O <sub>4</sub> @Co <sub>3</sub> O <sub>4</sub>   | 64                  | 100                 | 243                 | 260                 | 216                 | 230                 | 217                 | 230                 |
| Co <sub>3</sub> O <sub>4</sub> @Co <sub>2</sub> MnO <sub>4</sub> | 70                  | 100                 | 254                 | 260                 | 245                 | 250                 | 246                 | 250                 |
| Co <sub>3</sub> O <sub>4</sub> @Co <sub>2</sub> CuO <sub>4</sub> | 90                  | 110                 | 244                 | 250                 | 218                 | 230                 | 223                 | 240                 |
| Co <sub>3</sub> O <sub>4</sub> @MnO <sub>2</sub>                 | 170                 | 230                 | 242                 | 280                 | 225                 | 260                 | 240                 | 280                 |
| Pt/Al <sub>2</sub> O <sub>3</sub>                                | 213                 | 220                 | 206                 | 220                 | 270                 | 280                 | 272                 | 280                 |

**Table S2** Physical and Chemical parameters of all the samples.

| Samples                                                          | Mass loadings of per unit area (mg cm <sup>-2</sup> ) | S <sub>BET</sub> (m <sup>2</sup> g <sup>-1</sup> ) | V <sub>pore</sub> (cm <sup>3</sup> g <sup>-1</sup> ) | Co <sup>3+</sup> /Co <sup>2+</sup> | O <sub>α</sub> | O <sub>β</sub> | O <sub>γ</sub> |
|------------------------------------------------------------------|-------------------------------------------------------|----------------------------------------------------|------------------------------------------------------|------------------------------------|----------------|----------------|----------------|
|                                                                  |                                                       |                                                    |                                                      |                                    | %              | %              | %              |
| Co <sub>3</sub> O <sub>4</sub>                                   | 2.586                                                 | 27.49                                              | 0.131                                                | 1.85                               | 54.21          | 21.65          | 22.28          |
| Co <sub>3</sub> O <sub>4</sub> @Co <sub>3</sub> O <sub>4</sub>   | 3.356                                                 | 60.92                                              | 0.204                                                | 2.36                               | 46.02          | 29.76          | 23.5           |
| Co <sub>3</sub> O <sub>4</sub> @Co <sub>2</sub> MnO <sub>4</sub> | 3.394                                                 | 48.88                                              | 0.144                                                | 2.19                               | 50.47          | 29.15          | 20.37          |
| Co <sub>3</sub> O <sub>4</sub> @Co <sub>2</sub> CuO <sub>4</sub> | 3.271                                                 | 31.38                                              | 0.151                                                | 2.32                               | 48.16          | 29.56          | 22.28          |
| Co <sub>3</sub> O <sub>4</sub> @MnO <sub>2</sub>                 | 3.374                                                 | 51.82                                              | 0.137                                                | 1.86                               | 71.35          | 12.18          | 16.47          |
| Pt/Al <sub>2</sub> O <sub>3</sub>                                | —                                                     | 259.91                                             | 0.934                                                | —                                  | —              | —              | —              |
| Ni foam                                                          | —                                                     | 21.65                                              | 0.059                                                | —                                  | —              | —              | —              |

**Table S3** Catalytic performances of CO and/or toluene oxidation over  $\text{Co}_3\text{O}_4@\text{Co}_3\text{O}_4$  and  $\text{Co}_3\text{O}_4@\text{Co}_2\text{MnO}_4$  catalysts at different atmospheres.

| Samples                                         | moisture | Simple conditions       |                         |                         |                         |
|-------------------------------------------------|----------|-------------------------|-------------------------|-------------------------|-------------------------|
|                                                 |          | CO                      |                         | toluene                 |                         |
|                                                 |          | $T_{50}/^\circ\text{C}$ | $T_{99}/^\circ\text{C}$ | $T_{50}/^\circ\text{C}$ | $T_{99}/^\circ\text{C}$ |
| $\text{Co}_3\text{O}_4@\text{Co}_3\text{O}_4$   | Dry      | 64                      | 100                     | 243                     | 260                     |
|                                                 | 1 vol.%  | 113                     | 140                     | 255                     | 260                     |
|                                                 | 5 vol.%  | 118                     | 150                     | 265                     | 270                     |
| $\text{Co}_3\text{O}_4@\text{Co}_2\text{MnO}_4$ | Dry      | 70                      | 100                     | 254                     | 260                     |
|                                                 | 1 vol.%  | 130                     | 170                     | 257                     | 270                     |
|                                                 | 5 vol.%  | 137                     | 180                     | 260                     | 270                     |

**Table S4** Catalytic performances of as-synthesized  $\text{Co}_3\text{O}_4$ -based catalysts for CO and toluene co-oxidation in different moisture.

| Samples                                         | 1.0 vol.% $\text{H}_2\text{O}$ |                         |                         |                         | 5.0 vol.% $\text{H}_2\text{O}$ |                         |                         |                         |
|-------------------------------------------------|--------------------------------|-------------------------|-------------------------|-------------------------|--------------------------------|-------------------------|-------------------------|-------------------------|
|                                                 | CO                             |                         | toluene                 |                         | CO                             |                         | toluene                 |                         |
|                                                 | $T_{50}/^\circ\text{C}$        | $T_{99}/^\circ\text{C}$ | $T_{50}/^\circ\text{C}$ | $T_{99}/^\circ\text{C}$ | $T_{50}/^\circ\text{C}$        | $T_{99}/^\circ\text{C}$ | $T_{50}/^\circ\text{C}$ | $T_{99}/^\circ\text{C}$ |
| $\text{Co}_3\text{O}_4$                         | 272                            | 280                     | 273                     | 280                     | 275                            | 280                     | 274                     | 280                     |
| $\text{Co}_3\text{O}_4@\text{Co}_3\text{O}_4$   | 253                            | 260                     | 253                     | 260                     | 256                            | 270                     | 263                     | 270                     |
| $\text{Co}_3\text{O}_4@\text{Co}_2\text{MnO}_4$ | 264                            | 270                     | 258                     | 270                     | 265                            | 270                     | 263                     | 270                     |
| $\text{Co}_3\text{O}_4@\text{Co}_2\text{CuO}_4$ | 262                            | 270                     | 263                     | 280                     | 263                            | 280                     | 263                     | 280                     |
| $\text{Co}_3\text{O}_4@\text{MnO}_2$            | 234                            | 280                     | 250                     | 290                     | 240                            | 280                     | 255                     | 290                     |
